# Supplementary material for: Highly active mesostructured silica hosted silver catalysts for CO oxidation using the one-pot synthesis approach
Source: Royal Society of Chemistry journal article supplement (doi:10.1039/b804641g), 2008-01-01
Supplement: b804641g.pdf [file b804641g.pdf]

## Supplementary Information

# Highly active mesostructured-silica hosted silver catalysts for CO oxidation using the one-pot synthesis approach

Hongyang Liu<sup>a</sup>, Ding Ma<sup>a\*</sup>, Ross. A. Blackley<sup>b</sup>, Wuzong Zhou<sup>b</sup> and Xinhe Bao<sup>a\*</sup>

<sup>a</sup> State Key Laboratory of Catalysis, Dalian Institute of Chemical Physics, The Chinese Academy of Sciences, Dalian 116023, P. R. China. Emails: xhbao@dicp.ac.cn (X.Bao); dma@dicp.ac.cn (D.Ma); Fax: +86-0411-8469444; TEL: +86-0411-84379256;

<sup>b</sup> School of Chemistry, University of St. Andrews, St. Andrews, KY16 9ST, United Kingdom

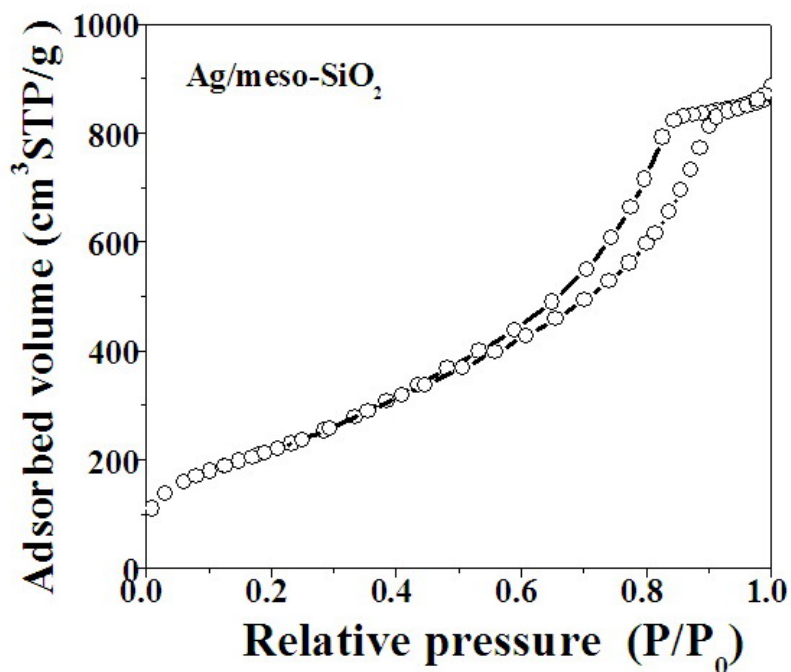

Figure S1 Nitrogen adsorption isotherm profile of Ag/meso-SiO<sub>2</sub> measured at 77 K
